# Supplementary material
Source: publisher figshare collection journal article supplement (https://gsajournals.figshare.com/ndownloader/files/12928931)
Supplement: Supplementary file 1 [file 12928931]

## SUPPLEMENTARY INFORMATION

**Table S1: MLP and CNN hyperparameters together with value ranges optimized with a genetic algorithm.**

| Hyperparameter              | Values                                                                   | Utility                                                                                                      | Potential issues                                                                             |
|-----------------------------|--------------------------------------------------------------------------|--------------------------------------------------------------------------------------------------------------|----------------------------------------------------------------------------------------------|
| Number of layers            | [1, 2, 3, 4, 5]                                                          | The bigger the number, the higher the flexibility.                                                           | It increases the number of weights to learn, increasing computing time and memory cost.      |
| Neurons per layer           | [16, 32, 64, 128]                                                        | The bigger the number, the higher the flexibility.                                                           | It increases the number of weights to learn, increasing the time and memory cost.            |
| Convolutional kernel width* | [2, 3, 5, 10]                                                            | A larger kernel allows learning more complex patterns.                                                       | A smaller kernel has the risk to underfit while a large one suffers the risk of overfitting. |
| Optimizer                   | ['rmsprop', 'adam', 'sgd', 'adagrad', 'adadelat', 'adamax', 'nadam']     | Optimization algorithms for training deep models includes some specializations to solve different challenges | There is no consensus about which algorithm performs the best.                               |
| Activation                  | ['relu', 'elu', 'tanh', 'sigmoid', 'hard_sigmoid', 'softplus', 'linear'] | Makes possible to learn non-linear complex functional mappings between the inputs and response variable.     | There is no best activation function.                                                        |
| Weight regularization       | [0.01, 0.15, 0.225, 0.3]                                                 | Decreasing the weight regularization allows the model to fit the training data better.                       | Low value may cause overfitting.                                                             |
| Dropout                     | [0.01, 0.15, 0.225, 0.3]                                                 | A higher dropout helps to reduce overfitting.                                                                | Information is lost when nodes are ignored by a high dropout.                                |

\* Defined only in CNNs, it is the number of SNPs per window.

6 **Table S2: Correlation in height prediction for several SNP window sizes and strides.**

| Window size | Stride | BEST  | UNIF  |
|-------------|--------|-------|-------|
| 2           | 1      | 0.336 | 0.263 |
| 3           | 1      | 0.432 | 0.249 |
| 5           | 1      | 0.414 | 0.259 |
| 10          | 1      | 0.405 | 0.269 |
| 2           | 2      | 0.425 | 0.240 |
| 3           | 3      | 0.418 | 0.245 |
| 5           | 5      | 0.406 | 0.254 |
| 10          | 10     | 0.391 | 0.234 |

7 Results shown were obtained with CNN3 method and 10k BEST SNP set.

8

**Algorithm 1**


---

```

1: procedure GA( $p, \beta, \delta$ )
2:   Generate  $p$  feasible solutions randomly  $\rightarrow Pop$  ▷  $\rightarrow$  is the assign function
3:   for  $i=1$  to  $\delta$  do ▷  $\delta$  number of generations
4:     for all members of  $Pop$  do
5:       score based on fitness score ▷ R value in validation
6:     end for
7:      $Sel = \{\}$ 
8:      $n_e = n \cdot \beta$  ▷  $n_e$  number of elitism
9:      $Pop_2 = \{\text{Best } n_e \text{ solutions in } Pop\}$  ▷ Select the best  $n_e$  solutions in  $Pop$ 
10:     $Sel = Sel \cup Pop_2$ 
11:     $Pop_2 = \{n_e \text{ random solutions from } Pop \setminus Sel\}$  ▷ Select other  $n_e$  solutions
12:     $Sel = Sel \cup Pop_2$ 
13:    Mutate some of the parameters on some of the networks in  $Sel$ 
14:     $Pop = Sel$ 
15:     $n_c = n - |Sel|$ 
16:    for  $j=1$  to  $n_c$  do ▷ Breeding between  $Sel$ 
17:      Randomly select two solutions from  $Sel$ :  $(X_A, X_B)$ 
18:      Combine a random assortment of parameters from  $X_A$  and  $X_B \rightarrow X_C$ 
19:       $Pop = Pop \cup X_C$ 
20:    end for
21:  end for ▷ Each iteration through these steps is called a generation
22:  return Pop
23: end procedure

```

---

9

10 **Figure S1: Genetic algorithm used for hyperparameter optimization.** The genetic algorithm is defined  
11 with the following parameters:  $p$ , number of individuals (hyperparameter combinations) per generation;  
12  $\beta$ , percentage of individuals selected and  $\delta$ , number of generations.

13

14

15

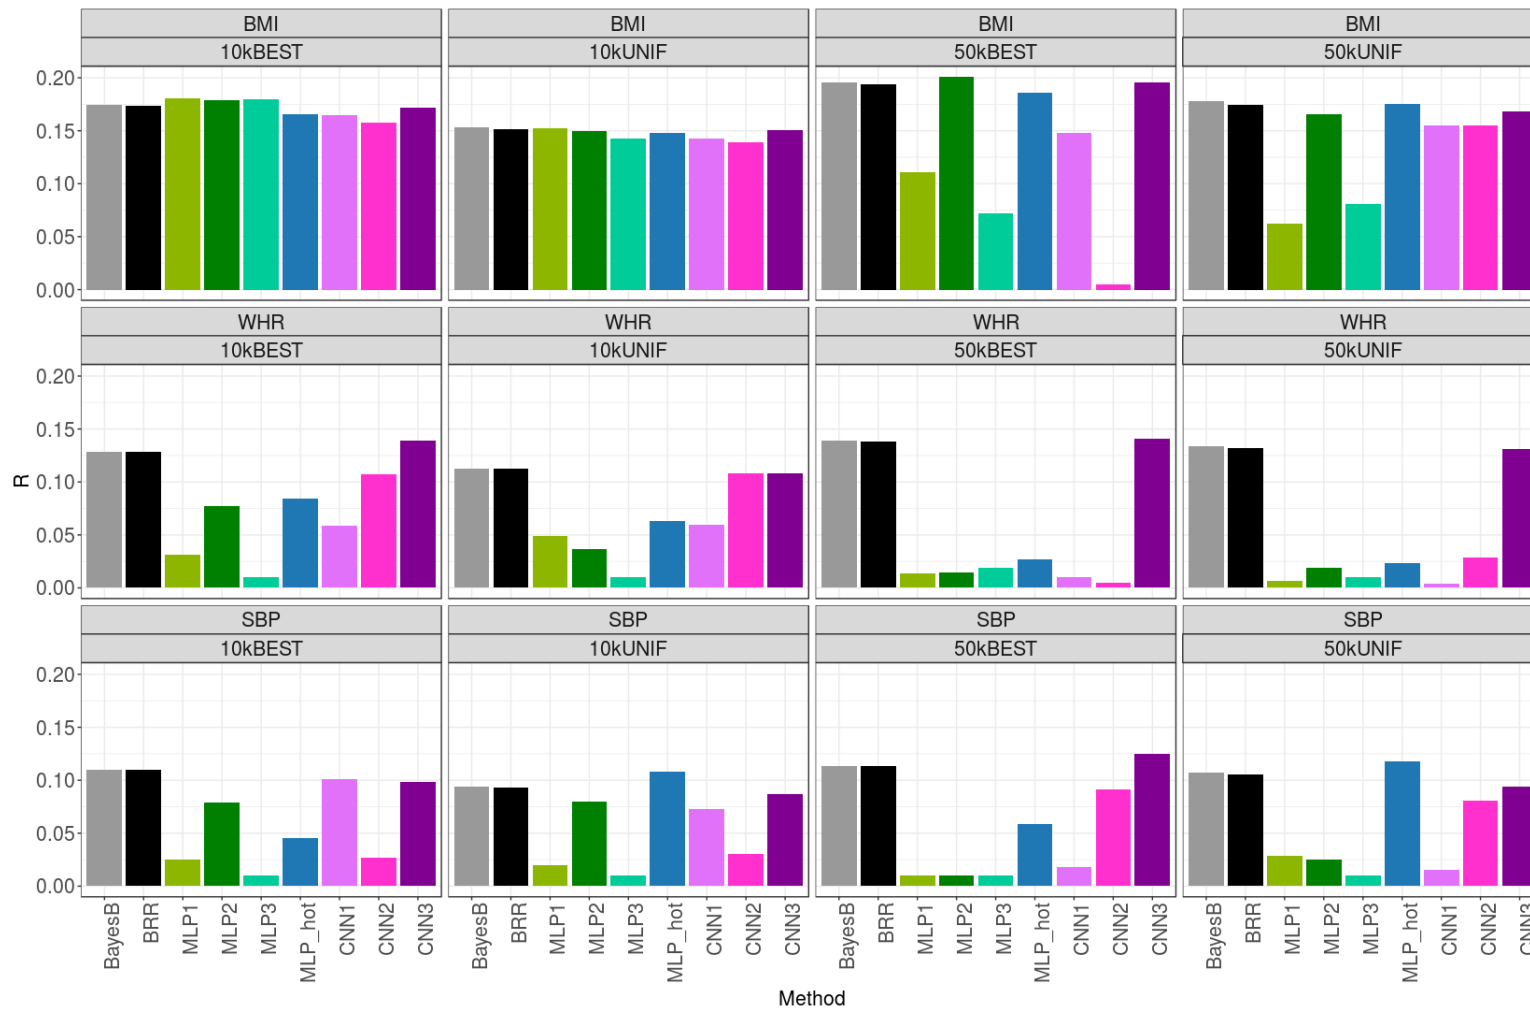

16

17 **Figure S2: Prediction performance across methods and traits.** Grey, green, blue and magenta bars correspond to linear, MLPs, hot-encoding  
 18 MLP and CNNs methods, respectively. Very low bar means method not converging. Average SE of R's were  $\sim 4 \times 10^{-3}$ .
